# Supplementary material for: Identification of Plasma Lipid Biomarkers for Prostate Cancer by Lipidomics and Bioinformatics
Source: PLoS One. 2012 Nov 12;7(11):e48889. doi: 10.1371/journal.pone.0048889 (PMC3495963; doi:10.1371/journal.pone.0048889)
Supplement: Figure S1 — Hierachical Cluster Analysis (HCA) based on 15 apparent lipid species and 141 subjectsand their clinical characteristics. Exel files. (XLSX) [file pone.0048889.s001.xlsx]

## Sheet: Sheet1
Figure S1 Hierachical Cluster Analysis (HCA) based on 15 apparent lipid species and 141
subjects and their clinical characteristics
