# Supplementary material for: Identification of Plasma Lipid Biomarkers for Prostate Cancer by Lipidomics and Bioinformatics
Source: PLoS One. 2012 Nov 12;7(11):e48889. doi: 10.1371/journal.pone.0048889 (PMC3495963; doi:10.1371/journal.pone.0048889)
Supplement: Table S1 — Difference in plasma concentration of individual apparent lipid species between patient and control. Exel files. (XLSX) [file pone.0048889.s002.xlsx]

## Sheet: sheet 1
Table S1 Difference in plasma concentration of individual apparent lipid species between patient and control (nmol/ul)
Individual	Compound	Mass/z of	Analyzed	Prostate Cancer (105)		Control (36)		p	Patient/Control
lipid Species	Formula	analyzed ion	Adduct	Mean	SD	Mean	SD	value	Fold
C13:0 CE	C40H74NO2	600.57	[M + NH4]+	1.52259e-16	4.99661e-16	0	0	1	-
C13:1 CE	C40H72NO2	598.554	[M + NH4]+	0.0632148	0.0704164	0.0350978	0.0504535	3.85201e-05	1.80111
C14:0 CE	C41H76NO2	614.586	[M + NH4]+	0.0434938	0.0454098	0.0206349	0.0317738	0.00516104	2.10778
C14:1 CE	C41H74NO2	612.57	[M + NH4]+	0.0118342	0.0431876	0.00225469	0.00574426	0.609516	5.2487
C15:0 CE	C42H78NO2	628.601	[M + NH4]+	0.00500841	0.00694937	0.00176608	0.00369607	1.57284e-05	2.83589
C16:0 CE	C43H80NO2	642.617	[M + NH4]+	0.532814	0.232401	0.394334	0.218557	0.0165545	1.35117
C16:1 CE	C43H78NO2	640.601	[M + NH4]+	0.278239	0.232619	0.188313	0.203445	0.0166649	1.47753
C17:0 CE	C44H82NO2	656.632	[M + NH4]+	0.023853	0.0293454	0.0072181	0.010448	4.18771e-05	3.30461
C17:1 CE	C44H80NO2	654.617	[M + NH4]+	0.0169492	0.0173229	0.00652471	0.0106299	0.00011707	2.5977
C18:0 CE	C45H84NO2	670.648	[M + NH4]+	0.0425191	0.0387719	0.0175045	0.0264981	0.000645479	2.42905
C18:1 CE	C45H82NO2	668.632	[M + NH4]+	1.68357	0.662242	1.08333	0.712109	0.0127618	1.55407
C18:2 CE	C45H80NO2	666.617	[M + NH4]+	11.4986	4.35723	10.9898	4.80256	0.144262	1.0463
C18:3 CE	C45H78NO2	664.601	[M + NH4]+	0.414425	0.197103	0.376719	0.232271	0.0588142	1.10009
C19:0 CE	C46H86NO2	684.664	[M + NH4]+	0.073282	0.0992245	0.0248558	0.0388518	0.000180451	2.94828
C19:1 CE	C46H84NO2	682.648	[M + NH4]+	0.207906	0.232145	0.0723858	0.120268	1.59896e-05	2.87219
C19:2 CE	C46H82NO2	680.632	[M + NH4]+	0.0280372	0.0322911	0.0031061	0.00780864	9.93561e-14	9.0265
C19:3 CE	C46H80NO2	678.617	[M + NH4]+	0.0379126	0.0621631	0.00366816	0.00740256	8.31202e-11	10.3356
C20:0 CE	C47H88NO2	698.679	[M + NH4]+	0.0567758	0.10463	0.0145389	0.0474031	6.50054e-07	3.9051
C20:1 CE	C47H86NO2	696.664	[M + NH4]+	0.0220558	0.0257661	0.00758703	0.0121467	3.02213e-07	2.90704
C20:2 CE	C47H84NO2	694.648	[M + NH4]+	0.00406747	0.00625782	0.000970578	0.0015943	9.56399e-08	4.19077
C20:3 CE	C47H82NO2	692.632	[M + NH4]+	0.15274	0.0850938	0.101388	0.130707	0.00684771	1.50649
C20:4 CE	C47H80NO2	690.617	[M + NH4]+	2.64166	1.19783	2.12857	1.16031	0.0228906	1.24105
C20:5 CE	C47H78NO2	688.601	[M + NH4]+	0.164367	0.128741	0.122632	0.109379	0.0110178	1.34033
C21:2 CE	C48H86NO2	708.664	[M + NH4]+	0.00236273	0.00526529	0.000271153	0.000766322	9.92137e-07	8.71364
C21:3 CE	C48H84NO2	706.648	[M + NH4]+	0.0285892	0.0396175	0.00965752	0.0165923	3.52632e-06	2.96031
C22:0 CE	C49H92NO2	726.71	[M + NH4]+	0.00232445	0.0054553	0.00363656	0.00955855	0.448958	0.639189
C22:1 CE	C49H90NO2	724.695	[M + NH4]+	0.0100072	0.0239749	0.00779471	0.0170541	0.090203	1.28384
C22:2 CE	C49H88NO2	722.679	[M + NH4]+	0.003678	0.00907111	0.000606905	0.00191323	8.48903e-06	6.06025
C22:3 CE	C49H86NO2	720.664	[M + NH4]+	0.00411137	0.00970897	0.000352898	0.000771261	1.31894e-09	11.6503
C22:4 CE	C49H84NO2	718.648	[M + NH4]+	0.00953774	0.020966	0.00181177	0.0029136	1.16467e-06	5.26431
C22:5 CE	C49H82NO2	716.632	[M + NH4]+	0.0303672	0.0404338	0.0139785	0.0170987	0.00214832	2.17242
C22:6 CE	C49H80NO2	714.617	[M + NH4]+	0.176187	0.120791	0.139187	0.13137	0.00785161	1.26583
C23:0 CE	C50H94NO2	740.726	[M + NH4]+	5.52644e-16	1.23241e-15	0	0	1	-
C23:1 CE	C50H92NO2	738.71	[M + NH4]+	0.00631871	0.0147357	0.00405742	0.0107109	0.00727447	1.55732
C23:2 CE	C50H90NO2	736.695	[M + NH4]+	0.00533707	0.012546	0.000827406	0.00201009	1.01448e-07	6.45037
C23:3 CE	C50H88NO2	734.679	[M + NH4]+	0.0157264	0.0291615	0.0078695	0.0127869	0.00274494	1.9984
C23:4 CE	C50H86NO2	732.664	[M + NH4]+	0.0218374	0.0363944	0.0235357	0.0347816	0.167405	0.927843
C23:5 CE	C50H84NO2	730.648	[M + NH4]+	0.00833553	0.0224178	0.00165994	0.00505727	2.94625e-06	5.0216
C24:0 CE	C51H96NO2	754.742	[M + NH4]+	0.00494624	0.0103179	0.00122204	0.00212432	0.000158731	4.04753
C24:1 CE	C51H94NO2	752.726	[M + NH4]+	0.00343557	0.0148158	0.00136207	0.00429769	0.677307	2.52232
C24:2 CE	C51H92NO2	750.71	[M + NH4]+	0.00171767	0.00602234	0.000176184	0.000574521	0.000273414	9.74929
C24:3 CE	C51H90NO2	748.695	[M + NH4]+	0.00316048	0.0120628	0.000750352	0.00202407	0.012208	4.21199
C24:4 CE	C51H88NO2	746.679	[M + NH4]+	0.0074068	0.0110355	0.00176192	0.00521371	2.43544e-08	4.20382
C24:5 CE	C51H86NO2	744.664	[M + NH4]+	0.00246898	0.00589448	0.00175325	0.00663229	0.0324731	1.40823
C24:6 CE	C51H84NO2	742.648	[M + NH4]+	0.0008511	0.00396811	0	0	0.0105489	-
C25:2 CE	C52H94NO2	764.726	[M + NH4]+	0.00367812	0.0166277	0.000741225	0.00225664	0.00686532	4.96221
C25:3 CE	C52H92NO2	762.71	[M + NH4]+	0.00191969	0.00828534	0.000286146	0.00100936	0.00670453	6.70879
C25:4 CE	C52H90NO2	760.695	[M + NH4]+	0.00112547	0.00482797	0.000117141	0.00048617	0.00456006	9.60783
C25:5 CE	C52H88NO2	758.679	[M + NH4]+	0.00297207	0.0083779	0.00125798	0.002965	0.0309088	2.36257
C25:6 CE	C52H86NO2	756.664	[M + NH4]+	0.00209061	0.00780031	0.0026287	0.00499497	0.676447	0.795303
DSM(16:0)	C39H81N2O6P	705.6	[M + H]+	0.0122292	0.0119817	0.000539158	0.000802206	3.85138e-19	22.682
DSM(18:0)	C41H85N2O6P	733.6	[M + H]+	0.0060646	0.00786989	0.00368877	0.00531045	0.0070112	1.64407
DSM(22:0)	C45H93N2O6P	789.7	[M + H]+	0.014842	0.0187141	0.020802	0.0180821	0.0447228	0.71349
DSM(24:0)	C47H97N2O6P	817.7	[M + H]+	0.000228038	0.00157755	4.95994e-05	0.000190556	0.168351	4.59759
ePC(32:0)	C40H82O7PN	720.6	[M + H]+	0.00482189	0.00266899	0.00280809	0.00134661	1.50562e-07	1.71714
ePC(32:1)	C40H80O7PN	718.6	[M + H]+	0.00627061	0.00365955	0.00329849	0.00124475	7.27992e-10	1.90106
ePC(32:2)	C40H78O7PN	716.6	[M + H]+	0.00109461	0.000867664	0.000565414	0.000320371	8.83734e-10	1.93594
ePC(32:3)	C40H76O7PN	714.5	[M + H]+	0.00028201	0.000488188	6.58792e-05	5.632e-05	0.0496983	4.28071
ePC(34:0)	C42H86O7PN	748.6	[M + H]+	0.00222717	0.00150113	0.000956196	0.000465659	1.252e-14	2.3292
ePC(34:1)	C42H84O7PN	746.6	[M + H]+	0.0139792	0.00714152	0.00790149	0.00337934	4.3308e-06	1.76918
ePC(34:2)	C42H82O7PN	744.6	[M + H]+	0.0179905	0.00882569	0.0110933	0.00310696	2.32074e-06	1.62174
ePC(34:3)	C42H80O7PN	742.6	[M + H]+	0.0159822	0.00812826	0.0104108	0.00372187	7.55486e-07	1.53517
ePC(34:4)	C42H78O7PN	740.6	[M + H]+	0.000496166	0.00038112	0.000275182	0.000159976	0.0073254	1.80305
ePC(36:0)	C44H90O7PN	776.6	[M + H]+	0.000506186	0.00117187	6.74302e-05	0.00014108	0.000456721	7.50682
ePC(36:1)	C44H88O7PN	774.6	[M + H]+	0.0133339	0.00888926	0.0054851	0.00202101	6.30023e-10	2.43093
ePC(36:2)	C44H86O7PN	772.6	[M + H]+	0.025424	0.0122998	0.0125709	0.00494467	1.7153e-07	2.02245
ePC(36:3)	C44H84O7PN	770.6	[M + H]+	0.012951	0.0064485	0.00781514	0.00217248	4.85528e-08	1.65717
ePC(36:4)	C44H82O7PN	768.6	[M + H]+	0.0436875	0.0212833	0.0232887	0.00881131	6.22725e-07	1.8759
ePC(36:5)	C44H80O7PN	766.6	[M + H]+	0.0263134	0.0138581	0.0148238	0.00551046	4.31627e-07	1.77508
ePC(38:0)	C46H94O7PN	804.7	[M + H]+	0.00115117	0.00129237	0.000577843	0.00047381	1.16443e-05	1.99218
ePC(38:1)	C46H92O7PN	802.7	[M + H]+	0.0103108	0.00672544	0.0041533	0.00177847	4.14071e-11	2.48255
ePC(38:2)	C46H90O7PN	800.6	[M + H]+	0.00991591	0.00587884	0.00483707	0.00122502	6.37028e-12	2.04998
ePC(38:3)	C46H88O7PN	798.6	[M + H]+	0.00512487	0.00360124	0.00225999	0.00128483	4.53927e-08	2.26765
ePC(38:4)	C46H86O7PN	796.6	[M + H]+	0.0277311	0.0140492	0.0130185	0.00503319	3.01322e-08	2.13014
ePC(38:5)	C46H84O7PN	794.6	[M + H]+	0.0444848	0.0205474	0.0256637	0.0081717	4.54427e-07	1.73337
ePC(38:6)	C46H82O7PN	792.6	[M + H]+	0.0135794	0.00727328	0.00681408	0.00207446	4.35701e-11	1.99285
ePC(40:2)	C48H94O7PN	828.7	[M + H]+	0.00185771	0.00147303	0.000813323	0.000364023	5.93832e-10	2.2841
ePC(40:3)	C48H92O7PN	826.7	[M + H]+	0.00130232	0.00172632	0.000425841	0.000302132	9.14099e-08	3.05823
ePC(40:4)	C48H90O7PN	824.6	[M + H]+	0.00375197	0.00210769	0.00210507	0.00100673	1.2656e-09	1.78235
ePC(40:5)	C48H88O7PN	822.6	[M + H]+	0.00669459	0.00322194	0.00336536	0.00141192	2.6675e-10	1.98927
ePC(40:6)	C48H86O7PN	820.6	[M + H]+	0.00852181	0.00426011	0.00419379	0.00144374	4.03728e-11	2.03201
ePE(32:0)	C37H76O7PN	678.5	[M + H]+	2.95512e-05	9.36586e-05	5.79436e-06	1.00734e-05	1	5.1
ePE(32:1)	C37H74O7PN	676.5	[M + H]+	1.29263e-05	2.87962e-05	2.41828e-06	5.35806e-06	1	5.34526
ePE(32:2)	C37H72O7PN	674.5	[M + H]+	8.49531e-05	0.000254525	5.10723e-06	8.93903e-06	0.204115	16.6339
ePE(32:3)	C37H70O7PN	672.5	[M + H]+	4.05353e-05	0.000161908	3.30328e-06	4.56549e-06	0.319632	12.2712
ePE(34:0)	C39H80O7PN	706.6	[M + H]+	1.49685e-05	3.24858e-05	3.97832e-06	6.88844e-06	1	3.76251
ePE(34:1)	C39H78O7PN	704.6	[M + H]+	0.000329602	0.000338602	0.000115479	7.87567e-05	0.0568399	2.85422
ePE(34:2)	C39H76O7PN	702.5	[M + H]+	0.000321785	0.000275584	0.000174466	9.75033e-05	0.0947107	1.8444
ePE(34:3)	C39H74O7PN	700.5	[M + H]+	0.000312832	0.000216163	0.000174385	9.39082e-05	0.319632	1.79392
ePE(34:4)	C39H72O7PN	698.5	[M + H]+	1.5457e-05	2.53954e-05	1.68037e-05	1.69889e-05	1	0.919856
ePE(36:0)	C41H84O7PN	734.6	[M + H]+	4.70071e-05	0.000163972	6.17684e-06	1.11179e-05	0.319632	7.61022
ePE(36:1)	C41H82O7PN	732.6	[M + H]+	0.000226426	0.000205814	6.74901e-05	7.22125e-05	0.319632	3.35495
ePE(36:2)	C41H80O7PN	730.6	[M + H]+	0.000842591	0.000594059	0.0003746	0.0001813	3.52133e-07	2.24931
ePE(36:3)	C41H78O7PN	728.6	[M + H]+	0.000934311	0.000749532	0.000517987	0.000184247	3.82977e-07	1.80373
ePE(36:4)	C41H76O7PN	726.5	[M + H]+	0.00238111	0.00173611	0.00116	0.000572567	1.21439e-11	2.05269
ePE(36:5)	C41H74O7PN	724.5	[M + H]+	0.00123855	0.000876116	0.000805813	0.000351074	1.73634e-07	1.53702
ePE(38:0)	C43H88O7PN	762.6	[M + H]+	0.000296091	0.000259853	0.000120255	0.00010202	0.319632	2.4622
ePE(38:1)	C43H86O7PN	760.6	[M + H]+	0.000137691	0.00011979	3.99764e-05	3.65106e-05	1	3.44431
ePE(38:2)	C43H84O7PN	758.6	[M + H]+	0.000156466	0.000164953	5.03538e-05	5.0221e-05	1	3.10733
ePE(38:3)	C43H82O7PN	756.6	[M + H]+	0.000121798	0.000135415	6.33237e-05	6.86246e-05	1	1.92342
ePE(38:4)	C43H80O7PN	754.6	[M + H]+	0.00222832	0.00172661	0.000914008	0.00056612	6.25568e-13	2.43797
ePE(38:5)	C43H78O7PN	752.6	[M + H]+	0.00480594	0.00348308	0.00275942	0.00113642	6.09294e-08	1.74165
ePE(38:6)	C43H76O7PN	750.5	[M + H]+	0.00374634	0.00263443	0.00199501	0.000735677	1.67544e-10	1.87786
ePE(40:2)	C45H88O7PN	786.6	[M + H]+	0.000168991	0.000165823	6.80296e-05	5.97433e-05	1	2.48408
ePE(40:3)	C45H86O7PN	784.6	[M + H]+	0.000152355	0.000169463	7.03853e-05	6.84846e-05	0.319632	2.16458
ePE(40:4)	C45H84O7PN	782.6	[M + H]+	0.000339591	0.000331331	0.000154597	0.000142248	0.0633223	2.19661
ePE(40:5)	C45H82O7PN	780.6	[M + H]+	0.000995103	0.000714658	0.000545838	0.000275639	4.97391e-07	1.82307
ePE(40:6)	C45H80O7PN	778.6	[M + H]+	0.00211252	0.00154153	0.00104889	0.000426261	5.07982e-13	2.01405
ePS(34:1)	C40H78O9PN	748.5	[M + H]+	9.68933e-06	3.54644e-05	2.89465e-06	1.21971e-05	1	3.34732
ePS(34:2)	C40H76O9PN	746.5	[M + H]+	9.32087e-06	4.75558e-05	2.94102e-06	4.9921e-06	1	3.16926
ePS(36:0)	C42H84O9PN	778.6	[M + H]+	8.02555e-06	2.39815e-05	2.9142e-05	7.55189e-05	1	0.275395
ePS(36:1)	C42H82O9PN	776.6	[M + H]+	8.34531e-06	1.99074e-05	7.94193e-07	2.76146e-06	1	10.5079
ePS(36:2)	C42H80O9PN	774.6	[M + H]+	5.55596e-06	1.83377e-05	2.29584e-06	6.66909e-06	1	2.42001
ePS(36:3)	C42H78O9PN	772.5	[M + H]+	4.15587e-06	1.12929e-05	1.70799e-06	4.35075e-06	1	2.4332
ePS(38:1)	C44H86O9PN	804.6	[M + H]+	6.57915e-06	1.36031e-05	1.38176e-06	5.10207e-06	1	4.76144
ePS(38:2)	C44H84O9PN	802.6	[M + H]+	2.4984e-06	9.52021e-06	1.7105e-06	3.22654e-06	1	1.46063
ePS(38:3)	C44H82O9PN	800.6	[M + H]+	4.70285e-06	1.44498e-05	1.27356e-06	3.0884e-06	1	3.69269
ePS(38:4)	C44H80O9PN	798.6	[M + H]+	9.20511e-06	1.81479e-05	5.41167e-06	1.49788e-05	1	1.70097
ePS(38:5)	C44H78O9PN	796.5	[M + H]+	6.54009e-06	2.03866e-05	2.74591e-06	6.03623e-06	1	2.38176
ePS(38:6)	C44H76O9PN	794.5	[M + H]+	2.25657e-06	1.12757e-05	4.29789e-06	1.20981e-05	1	0.525042
ePS(40:2)	C46H88O9PN	830.6	[M + H]+	4.66575e-05	6.35731e-05	2.01316e-05	3.36741e-05	1	2.31763
ePS(40:3)	C46H86O9PN	828.6	[M + H]+	1.28736e-05	3.66879e-05	2.95102e-06	6.46298e-06	1	4.36242
ePS(40:4)	C46H84O9PN	826.6	[M + H]+	6.89874e-06	2.23117e-05	4.24048e-06	9.13281e-06	1	1.62688
ePS(40:5)	C46H82O9PN	824.6	[M + H]+	5.34673e-06	1.38517e-05	4.41952e-06	7.85956e-06	1	1.2098
LPC(16:0)	C24H50O7PN	496.3	[M + H]+	0.240307	0.121431	0.085014	0.0388241	2.03454e-06	2.82668
LPC(16:1)	C24H48O7PN	494.3	[M + H]+	0.0061947	0.00357243	0.00221118	0.00130528	2.32775e-15	2.80154
LPC(18:0)	C26H54O7PN	524.4	[M + H]+	0.074614	0.0396553	0.0302893	0.0107441	2.99615e-08	2.46338
LPC(18:1)	C26H52O7PN	522.3	[M + H]+	0.043432	0.022817	0.0158234	0.00624279	2.63477e-09	2.7448
LPC(18:2)	C26H50O7PN	520.3	[M + H]+	0.0616649	0.0351873	0.0279661	0.013461	1.25572e-06	2.20499
LPC(18:3)	C26H48O7PN	518.3	[M + H]+	0.00101936	0.000763451	0.000465157	0.000383952	7.72205e-05	2.19144
LPC(20:0)	C28H58O7PN	552.4	[M + H]+	0.000477327	0.000850651	0.000159357	0.000100313	0.00655858	2.99533
LPC(20:1)	C28H56O7PN	550.4	[M + H]+	0.000662818	0.000616929	0.000154144	8.44131e-05	0.000396552	4.29998
LPC(20:2)	C28H54O7PN	548.4	[M + H]+	0.000659355	0.000633243	0.000176302	8.4013e-05	7.23192e-05	3.73992
LPC(20:3)	C28H52O7PN	546.3	[M + H]+	0.00280751	0.00167343	0.00139152	0.000911026	2.91323e-09	2.01758
LPC(20:4)	C28H50O7PN	544.3	[M + H]+	0.0146302	0.00940924	0.00460953	0.00195299	1.71184e-15	3.17391
LPC(20:5)	C28H48O7PN	542.3	[M + H]+	0.000713931	0.0007475	0.000250353	0.000195943	0.000574416	2.8517
LPC(22:5)	C30H52O7PN	570.3	[M + H]+	0.000793913	0.000543187	0.000336843	0.000211697	3.33052e-05	2.35692
LPC(22:6)	C30H50O7PN	568.3	[M + H]+	0.00238855	0.00167064	0.000777014	0.000377593	1.74834e-20	3.07402
LPE(16:0)	C21H44O7PN	454.3	[M + H]+	0.0017044	0.0011857	0.000689173	0.00050942	3.00771e-11	2.47311
LPE(16:1)	C21H42O7PN	452.3	[M + H]+	6.10376e-05	0.00014624	1.51376e-05	3.30035e-05	0.319632	4.03217
LPE(18:1)	C23H46O7PN	480.3	[M + H]+	0.00263984	0.00345139	0.00464767	0.0109875	0.0397982	0.567993
LPE(18:2)	C23H44O7PN	478.3	[M + H]+	0.00366595	0.00356621	0.00539791	0.0113482	0.0336538	0.679143
LPE(18:3)	C23H42O7PN	476.3	[M + H]+	3.15206e-05	7.5977e-05	1.20815e-05	1.69037e-05	1	2.609
LPE(20:0)	C25H52O7PN	510.3	[M + H]+	1.25894e-05	3.91231e-05	4.41154e-06	6.87604e-06	1	2.85374
LPE(20:1)	C25H50O7PN	508.3	[M + H]+	3.8234e-05	6.51908e-05	6.75709e-06	1.03851e-05	1	5.65836
LPE(20:2)	C25H48O7PN	506.3	[M + H]+	6.95038e-05	0.00014414	1.15429e-05	2.36878e-05	1	6.02136
LPE(20:3)	C25H46O7PN	504.3	[M + H]+	0.00019522	0.000184258	0.000110198	0.000127197	0.319632	1.77153
LPE(20:4)	C25H44O7PN	502.3	[M + H]+	0.00167093	0.00148231	0.000626989	0.000372674	2.25862e-13	2.66501
LPE(20:5)	C25H42O7PN	500.3	[M + H]+	5.75283e-05	0.000124062	8.42672e-06	1.79706e-05	1	6.8269
LPE(22:5)	C27H46O7PN	528.3	[M + H]+	0.000253463	0.000347626	5.35702e-05	5.52685e-05	0.215322	4.73143
LPE(22:6)	C27H44O7PN	526.3	[M + H]+	0.00064867	0.000565049	0.000304467	0.000227176	0.00010501	2.13051
PA(32:0)	C35H69O8P	666.5	[M + NH4]+	4.57778e-05	7.89426e-05	1.42339e-05	3.17385e-05	1	3.21611
PA(32:1)	C35H67O8P	664.5	[M + NH4]+	5.47866e-05	9.89211e-05	4.30731e-05	6.48657e-05	1	1.27195
PA(32:2)	C35H65O8P	662.4	[M + NH4]+	8.65657e-05	0.000178143	8.47706e-05	0.000110439	0.320569	1.02118
PA(32:3)	C35H63O8P	660.4	[M + NH4]+	2.75442e-05	6.30282e-05	5.94312e-05	7.496e-05	1	0.463463
PA(32:4)	C35H61O8P	658.4	[M + NH4]+	2.26667e-05	4.38945e-05	2.44476e-05	4.23092e-05	1	0.927154
PA(34:1)	C37H71O8P	692.5	[M + NH4]+	8.55358e-05	0.000124798	7.87433e-05	0.000102833	1	1.08626
PA(34:2)	C37H69O8P	690.5	[M + NH4]+	0.000105557	0.000143598	0.000183889	0.000201883	1	0.574025
PA(34:3)	C37H67O8P	688.5	[M + NH4]+	0.000172222	0.000178506	0.000567032	0.000535621	0.0545507	0.303726
PA(34:4)	C37H65O8P	686.4	[M + NH4]+	0.000237519	0.000389851	0.000565639	0.000566583	0.209194	0.419913
PA(36:2)	C39H73O8P	718.5	[M + NH4]+	0.000117932	0.000130968	0.000166237	0.000166937	1	0.70942
PA(36:3)	C39H71O8P	716.5	[M + NH4]+	3.1798e-05	5.09803e-05	3.90187e-05	7.42013e-05	1	0.814944
PA(36:4)	C39H69O8P	714.5	[M + NH4]+	1.97778e-05	2.99766e-05	4.09462e-05	7.24796e-05	1	0.483019
PA(36:5)	C39H67O8P	712.5	[M + NH4]+	1.91827e-05	3.59029e-05	6.89434e-05	7.42161e-05	1	0.278239
PA(36:6)	C39H65O8P	710.4	[M + NH4]+	3.14213e-05	4.90973e-05	6.85943e-05	7.48545e-05	1	0.458075
PA(38:2)	C41H77O8P	746.5	[M + NH4]+	7.74617e-05	0.00012069	0.000169593	0.000225274	1	0.456752
PA(38:3)	C41H75O8P	744.5	[M + NH4]+	4.9476e-05	6.22852e-05	9.38014e-05	0.000137451	1	0.527455
PA(38:4)	C41H73O8P	742.5	[M + NH4]+	2.38672e-05	4.2029e-05	4.21394e-05	5.85661e-05	1	0.566387
PA(38:5)	C41H71O8P	740.5	[M + NH4]+	3.01717e-05	4.77906e-05	4.87091e-05	6.50139e-05	1	0.619427
PA(38:6)	C41H69O8P	738.5	[M + NH4]+	4.45808e-05	7.11315e-05	3.9938e-05	5.54075e-05	1	1.11625
PA(40:5)	C43H75O8P	768.5	[M + NH4]+	1.28968e-05	5.12142e-05	4.09231e-05	7.45168e-05	1	0.315148
PA(40:6)	C43H73O8P	766.5	[M + NH4]+	3.11111e-06	1.65975e-05	2.12329e-06	1.08267e-05	1	1.46523
PA(40:7)	C43H71O8P	764.5	[M + NH4]+	0.000125294	0.000197893	0.000109161	0.000238826	1	1.14779
PC(28:0)	C36H71O8PN	678.5	[M + H]+	0.000120714	0.000237966	0.000116712	0.000124916	0.324813	1.03429
PC(28:1)	C36H70O8PN	676.5	[M + H]+	0.00509625	0.00344192	0.00225366	0.000970973	2.59841e-11	2.26132
PC(30:0)	C38H76O8PN	706.5	[M + H]+	0.00620248	0.003591	0.00306661	0.00213808	8.267e-07	2.02259
PC(30:1)	C38H74O8PN	704.5	[M + H]+	0.000682953	0.00495297	0.014254	0.0187217	0.000957952	0.047913
PC(32:0)	C40H80O8PN	734.6	[M + H]+	0.0237729	0.0119268	0.0149498	0.00620251	6.73051e-05	1.59018
PC(32:1)	C40H78O8PN	732.5	[M + H]+	0.0179798	0.0358091	0.0176794	0.0148464	0.867275	1.01699
PC(32:2)	C40H76O8PN	730.5	[M + H]+	0.00326246	0.00378319	0.00383371	0.00365557	0.904057	0.850991
PC(34:0)	C42H84O8PN	762.6	[M + H]+	0.00260207	0.00386734	0.00105231	0.00126046	0.0107984	2.47271
PC(34:1)	C42H82O8PN	760.6	[M + H]+	0.343464	0.193749	0.164049	0.0714226	0.000184055	2.09367
PC(34:2)	C42H80O8PN	758.6	[M + H]+	0.940992	0.406588	0.57742	0.169105	0.00114737	1.62965
PC(34:3)	C42H78O8PN	756.5	[M + H]+	0.0365367	0.0171338	0.020942	0.00805039	1.26585e-05	1.74466
PC(34:4)	C42H76O8PN	754.5	[M + H]+	0.0026656	0.00172679	0.00142479	0.000800237	6.10218e-09	1.87088
PC(36:0)	C44H88O8PN	790.6	[M + H]+	0.000434084	0.000938894	1.98853e-05	7.15304e-05	0.000123806	21.8293
PC(36:1)	C44H86O8PN	788.6	[M + H]+	0.0643548	0.0432585	0.0313748	0.0236067	8.42391e-05	2.05117
PC(36:2)	C44H84O8PN	786.6	[M + H]+	0.569651	0.235433	0.387848	0.0888451	0.00127761	1.46875
PC(36:3)	C44H82O8PN	784.6	[M + H]+	0.280404	0.124233	0.146102	0.0574287	0.000246049	1.91923
PC(36:4)	C44H80O8PN	782.6	[M + H]+	0.489554	0.248093	0.24533	0.0879422	0.000106118	1.99549
PC(36:5)	C44H78O8PN	780.5	[M + H]+	0.0299384	0.0217466	0.0164764	0.0100662	5.41162e-05	1.81705
PC(36:6)	C44H76O8PN	778.5	[M + H]+	0.00111616	0.000794664	0.000533158	0.000237092	3.19576e-08	2.09349
PC(38:0)	C46H92O8PN	818.7	[M + H]+	0.00377444	0.00272588	0.0015651	0.000672333	2.59165e-13	2.41163
PC(38:1)	C46H90O8PN	816.6	[M + H]+	6.73812e-05	0.000454057	0.00102695	0.00156317	0.00604572	0.0656127
PC(38:2)	C46H88O8PN	814.6	[M + H]+	0.00203991	0.00498252	0.00984562	0.0127567	0.0214118	0.20719
PC(38:3)	C46H86O8PN	812.6	[M + H]+	0.0769736	0.0370579	0.052824	0.02836	0.00390823	1.45717
PC(38:4)	C46H84O8PN	810.6	[M + H]+	0.380922	0.200088	0.181542	0.0724112	3.64518e-05	2.09826
PC(38:5)	C46H82O8PN	808.6	[M + H]+	0.136025	0.0681445	0.0609563	0.0233433	8.50285e-06	2.23152
PC(38:6)	C46H80O8PN	806.6	[M + H]+	0.141849	0.0738789	0.0748257	0.0287356	1.23449e-06	1.89573
PC(40:2)	C48H92O8PN	842.7	[M + H]+	0.00094007	0.000983806	0.000431285	0.00019154	6.25979e-06	2.17969
PC(40:3)	C48H90O8PN	840.6	[M + H]+	0.000369691	0.00060207	0.000116648	0.000218349	0.00392441	3.16928
PC(40:4)	C48H88O8PN	838.6	[M + H]+	0.00909219	0.00520655	0.00513371	0.00226366	2.83011e-06	1.77107
PC(40:5)	C48H86O8PN	836.6	[M + H]+	0.0213652	0.0117629	0.01231	0.00553211	5.27635e-05	1.7356
PC(40:6)	C48H84O8PN	834.6	[M + H]+	0.0654498	0.0355041	0.0331608	0.0124004	2.62101e-07	1.97371
PC(40:7)	C48H82O8PN	832.6	[M + H]+	0.0168808	0.0100226	0.00764169	0.00299705	4.37066e-11	2.20904
PC(40:8)	C48H80O8PN	830.6	[M + H]+	0.0031667	0.00189318	0.00168446	0.00059869	5.09014e-12	1.87995
PC(42:10)	C50H80O8PN	854.6	[M + H]+	0.00115758	0.000829452	0.000516094	0.000180946	1.19702e-09	2.24296
PC(42:11)	C50H78O8PN	852.5	[M + H]+	0.0021438	0.00111517	0.00117472	0.000528854	2.18028e-11	1.82494
PC(42:2)	C50H96O8PN	870.7	[M + H]+	0.000313975	0.000281055	0.000200708	0.00012095	0.158901	1.56434
PC(42:3)	C50H94O8PN	868.7	[M + H]+	0.000397628	0.000288337	0.000302688	0.000133107	0.0217836	1.31366
PC(42:4)	C50H92O8PN	866.7	[M + H]+	0.000352535	0.000219015	0.000187689	0.000115565	0.19184	1.87829
PC(42:5)	C50H90O8PN	864.6	[M + H]+	0.000722753	0.000503702	0.000397925	0.000228885	0.000203867	1.81631
PC(42:6)	C50H88O8PN	862.6	[M + H]+	0.000767311	0.000550537	0.000371317	0.000220977	0.00272637	2.06646
PC(42:7)	C50H86O8PN	860.6	[M + H]+	0.000731972	0.000472011	0.000391146	0.000172624	0.000323147	1.87135
PC(42:8)	C50H84O8PN	858.6	[M + H]+	0.000642881	0.000519469	0.000304251	0.000158869	0.0007788	2.11299
PC(42:9)	C50H82O8PN	856.6	[M + H]+	0.00103748	0.000785243	0.000480145	0.00019242	1.01586e-07	2.16077
PC(44:10)	C52H84O8PN	882.6	[M + H]+	0.000145519	0.000118422	8.21628e-05	0.000103587	1	1.77111
PC(44:11)	C52H82O8PN	880.6	[M + H]+	0.000357226	0.000318765	0.000197499	0.000186249	0.0856742	1.80875
PC(44:12)	C52H80O8PN	878.6	[M + H]+	0.00366125	0.00154684	0.00219407	0.00114219	6.67499e-09	1.6687
PC(44:2)	C52H100O8PN	898.7	[M + H]+	7.92319e-05	8.47733e-05	7.86877e-05	6.84116e-05	1	1.00692
PC(44:3)	C52H98O8PN	896.7	[M + H]+	5.37299e-05	6.06795e-05	3.84268e-05	4.20984e-05	1	1.39824
PC(44:4)	C52H96O8PN	894.7	[M + H]+	0.000131047	0.000116278	0.000128736	0.000124184	1	1.01795
PC(44:5)	C52H94O8PN	892.7	[M + H]+	6.43041e-05	0.000105738	2.64515e-05	4.26048e-05	1	2.43102
PC(44:6)	C52H92O8PN	890.7	[M + H]+	7.3789e-05	9.1631e-05	5.36026e-05	6.0846e-05	1	1.37659
PC(44:7)	C52H90O8PN	888.6	[M + H]+	7.18126e-05	0.000114603	4.6096e-05	5.36616e-05	1	1.55789
PC(44:8)	C52H88O8PN	886.6	[M + H]+	5.23254e-05	5.11992e-05	4.84629e-05	4.44145e-05	1	1.0797
PC(44:9)	C52H86O8PN	884.6	[M + H]+	4.89649e-05	6.31815e-05	3.64098e-05	4.52471e-05	1	1.34483
PE(28:0)	C33H66O8PN	636.5	[M + H]+	2.80276e-05	5.63298e-05	1.00109e-05	1.36579e-05	1	2.79972
PE(28:1)	C33H64O8PN	634.4	[M + H]+	1.5952e-05	4.7592e-05	3.50362e-06	5.01886e-06	1	4.55301
PE(30:0)	C35H70O8PN	664.5	[M + H]+	2.80294e-05	0.000114922	5.62047e-06	6.51782e-06	0.319632	4.98703
PE(30:1)	C35H68O8PN	662.5	[M + H]+	2.17225e-05	6.20989e-05	1.27908e-05	1.91865e-05	1	1.69829
PE(32:0)	C37H74O8PN	692.5	[M + H]+	4.35888e-05	8.27832e-05	6.6923e-06	1.03198e-05	1	6.51328
PE(32:1)	C37H72O8PN	690.5	[M + H]+	0.000132071	0.000370551	5.24139e-05	6.80176e-05	0.319632	2.51977
PE(32:2)	C37H70O8PN	688.5	[M + H]+	4.24952e-05	0.000205412	7.89352e-06	1.55007e-05	0.319632	5.38356
PE(34:0)	C39H78O8PN	720.5	[M + H]+	3.18746e-05	6.91841e-05	7.00453e-06	2.24113e-05	1	4.55058
PE(34:1)	C39H76O8PN	718.5	[M + H]+	0.00299318	0.00219441	0.0011174	0.000752689	1.641e-15	2.6787
PE(34:2)	C39H74O8PN	716.5	[M + H]+	0.00648931	0.00503983	0.00291153	0.00199647	2.2686e-10	2.22883
PE(34:3)	C39H72O8PN	714.5	[M + H]+	0.000277619	0.000199991	0.00018185	0.000151151	0.319632	1.52664
PE(34:4)	C39H70O8PN	712.5	[M + H]+	4.0374e-05	8.00602e-05	1.04189e-05	1.0784e-05	1	3.87509
PE(36:0)	C41H82O8PN	748.6	[M + H]+	0.000790435	0.000565491	0.000461684	0.000242745	2.30718e-05	1.71207
PE(36:1)	C41H80O8PN	746.6	[M + H]+	0.00309193	0.00265159	0.00119122	0.000964368	6.42185e-12	2.59561
PE(36:2)	C41H78O8PN	744.5	[M + H]+	0.0183775	0.0140238	0.00779397	0.0051551	3.9343e-09	2.35791
PE(36:3)	C41H76O8PN	742.5	[M + H]+	0.00768418	0.00607995	0.00320979	0.00362764	4.43608e-11	2.39398
PE(36:4)	C41H74O8PN	740.5	[M + H]+	0.00852131	0.00514607	0.0043181	0.00259425	1.93032e-09	1.97339
PE(36:5)	C41H72O8PN	738.5	[M + H]+	0.000500275	0.000367634	0.000275855	0.000203779	0.015028	1.81354
PE(36:6)	C41H70O8PN	736.5	[M + H]+	7.13394e-05	0.000107196	3.3179e-05	5.80752e-05	1	2.15013
PE(38:0)	C43H86O8PN	776.6	[M + H]+	0.00160586	0.00106432	0.000830344	0.000342752	1.98068e-11	1.93397
PE(38:1)	C43H84O8PN	774.6	[M + H]+	0.000701635	0.000580213	0.000337278	0.000205676	0.000117224	2.08029
PE(38:2)	C43H82O8PN	772.6	[M + H]+	0.000571068	0.000404423	0.000226767	0.000137245	0.000116065	2.5183
PE(38:3)	C43H80O8PN	770.6	[M + H]+	0.00125189	0.00109941	0.000698457	0.000687508	0.000442563	1.79236
PE(38:4)	C43H78O8PN	768.5	[M + H]+	0.0255471	0.0156928	0.0136133	0.00682593	3.95133e-07	1.87663
PE(38:5)	C43H76O8PN	766.5	[M + H]+	0.00840843	0.00452057	0.00429682	0.00225295	1.80767e-09	1.95689
PE(38:6)	C43H74O8PN	764.5	[M + H]+	0.00980255	0.00658243	0.0044785	0.00250016	5.91903e-10	2.1888
PE(40:2)	C45H86O8PN	800.6	[M + H]+	4.26331e-05	6.10861e-05	2.37149e-05	2.49291e-05	1	1.79773
PE(40:3)	C45H84O8PN	798.6	[M + H]+	4.47553e-05	7.82735e-05	2.10879e-05	4.25028e-05	1	2.12233
PE(40:4)	C45H82O8PN	796.6	[M + H]+	0.000659244	0.000648617	0.000507087	0.000408885	0.0473796	1.30006
PE(40:5)	C45H80O8PN	794.6	[M + H]+	0.00179976	0.0011964	0.00117561	0.000689067	5.92242e-06	1.53092
PE(40:6)	C45H78O8PN	792.5	[M + H]+	0.00688055	0.00461266	0.00321287	0.00184321	9.86867e-10	2.14156
PE(40:7)	C45H76O8PN	790.5	[M + H]+	0.00196053	0.00136383	0.000937333	0.00057561	1.98955e-12	2.0916
PE(40:8)	C45H74O8PN	788.5	[M + H]+	0.000245279	0.000294696	7.68942e-05	8.37782e-05	0.319632	3.18983
PE(42:10)	C47H74O8PN	812.5	[M + H]+	0.000280501	0.000256898	0.000183555	0.00014006	0.319632	1.52816
PE(42:2)	C47H90O8PN	828.6	[M + H]+	1.69252e-05	4.42271e-05	8.24074e-06	1.3833e-05	1	2.05384
PE(42:3)	C47H88O8PN	826.6	[M + H]+	9.76955e-06	3.24224e-05	2.99257e-06	6.31445e-06	1	3.2646
PE(42:4)	C47H86O8PN	824.6	[M + H]+	1.45618e-05	3.06815e-05	7.97248e-06	1.16627e-05	1	1.8265
PE(42:5)	C47H84O8PN	822.6	[M + H]+	1.37771e-05	3.21011e-05	1.12429e-05	1.16803e-05	1	1.2254
PE(42:6)	C47H82O8PN	820.6	[M + H]+	3.07476e-05	6.77751e-05	1.08722e-05	1.61996e-05	1	2.82808
PE(42:7)	C47H80O8PN	818.6	[M + H]+	2.48433e-05	3.72414e-05	2.45843e-05	5.16957e-05	1	1.01054
PE(42:8)	C47H78O8PN	816.5	[M + H]+	3.34238e-05	6.70416e-05	3.16234e-05	6.35774e-05	1	1.05693
PE(42:9)	C47H76O8PN	814.5	[M + H]+	0.000132134	0.000134635	7.13663e-05	8.41539e-05	1	1.85149
PE(44:10)	C49H78O8PN	840.5	[M + H]+	1.37651e-05	5.38152e-05	4.40721e-06	8.28536e-06	1	3.12332
PE(44:11)	C49H76O8PN	838.5	[M + H]+	1.54838e-05	3.7972e-05	6.74833e-06	1.02796e-05	1	2.29446
PE(44:12)	C49H74O8PN	836.5	[M + H]+	2.29038e-05	2.46052e-05	1.35988e-05	1.37338e-05	1	1.68425
PE(44:2)	C49H94O8PN	856.7	[M + H]+	7.91004e-06	2.29667e-05	3.9315e-06	7.83921e-06	1	2.01196
PE(44:3)	C49H92O8PN	854.7	[M + H]+	9.22769e-06	3.03787e-05	2.65984e-06	7.7974e-06	1	3.46926
PE(44:4)	C49H90O8PN	852.6	[M + H]+	1.1159e-05	2.20838e-05	1.23195e-05	1.98869e-05	1	0.905801
PE(44:5)	C49H88O8PN	850.6	[M + H]+	8.73193e-06	2.80095e-05	6.45233e-06	1.38466e-05	1	1.3533
PE(44:6)	C49H86O8PN	848.6	[M + H]+	5.69521e-06	1.51334e-05	4.3679e-06	1.37592e-05	1	1.30388
PE(44:7)	C49H84O8PN	846.6	[M + H]+	2.49866e-05	3.37384e-05	1.11659e-05	1.8154e-05	1	2.23775
PE(44:8)	C49H82O8PN	844.6	[M + H]+	1.05776e-05	2.5638e-05	5.47916e-06	1.10915e-05	1	1.93051
PE(44:9)	C49H80O8PN	842.6	[M + H]+	1.97384e-05	4.52017e-05	8.06509e-06	1.41075e-05	1	2.44738
PE-Cer(16:0)	C36H73O6PN2	661.5	[M + H]+	0.000271158	0.000251162	9.36081e-05	4.64418e-05	0.205935	2.89674
PE-Cer(16:1)	C36H71O6PN2	659.5	[M + H]+	9.08158e-05	0.00010424	2.16286e-05	1.94693e-05	1	4.19887
PE-Cer(18:0)	C38H77O6PN2	689.5	[M + H]+	1.90725e-05	3.47867e-05	6.26212e-06	1.06463e-05	1	3.0457
PE-Cer(18:1)	C38H75O6PN2	687.5	[M + H]+	4.46745e-05	6.33802e-05	1.21279e-05	8.59733e-06	1	3.68363
PE-Cer(24:0)	C44H89O6PN2	773.6	[M + H]+	0.000168662	0.000220352	9.22913e-05	0.000110047	0.319632	1.82749
PI(34:1)	C43H81O13P	854.5	[M + NH4]+	0.00619349	0.00482981	0.00434673	0.00329029	0.00100315	1.42486
PI(34:2)	C43H79O13P	852.5	[M + NH4]+	0.00812655	0.00446481	0.00588709	0.00401214	0.00282156	1.3804
PI(34:3)	C43H77O13P	850.5	[M + NH4]+	0.000172647	0.000178945	0.000158817	0.000247688	1	1.08709
PI(34:4)	C43H75O13P	848.5	[M + NH4]+	1.89059e-06	6.42406e-06	1.88273e-06	5.09564e-06	1	1.00417
PI(36:1)	C45H85O13P	882.6	[M + NH4]+	0.00518281	0.00335673	0.00290141	0.00179239	8.61855e-06	1.7863
PI(36:2)	C45H83O13P	880.6	[M + NH4]+	0.0254451	0.0139841	0.018182	0.0102836	0.00125036	1.39947
PI(36:3)	C45H81O13P	878.5	[M + NH4]+	0.00662189	0.00400351	0.00693729	0.00650356	0.0153915	0.954535
PI(36:4)	C45H79O13P	876.5	[M + NH4]+	0.00762459	0.00400653	0.00619882	0.00422734	0.00701022	1.23001
PI(36:5)	C45H77O13P	874.5	[M + NH4]+	5.62854e-05	8.97664e-05	8.87661e-05	0.00011873	1	0.634087
PI(36:6)	C45H75O13P	872.5	[M + NH4]+	5.84616e-06	2.07254e-05	1.59955e-05	3.67218e-05	1	0.365489
PI(38:0)	C47H91O13P	912.6	[M + NH4]+	5.39455e-06	1.62054e-05	4.75204e-06	1.10513e-05	1	1.13521
PI(38:1)	C47H89O13P	910.6	[M + NH4]+	7.44689e-06	2.29812e-05	1.45015e-05	5.77849e-05	1	0.513524
PI(38:2)	C47H87O13P	908.6	[M + NH4]+	0.000502369	0.000333935	0.000213541	0.000212879	0.0323947	2.35256
PI(38:3)	C47H85O13P	906.6	[M + NH4]+	0.0067664	0.00410833	0.00388276	0.00314355	5.12568e-05	1.74268
PI(38:4)	C47H83O13P	904.6	[M + NH4]+	0.0755342	0.0401261	0.0500597	0.0301139	0.00171981	1.50888
PI(38:5)	C47H81O13P	902.5	[M + NH4]+	0.00639662	0.00354634	0.00419431	0.00297253	3.92906e-05	1.52507
PI(38:6)	C47H79O13P	900.5	[M + NH4]+	0.000767111	0.000504541	0.000515297	0.000396987	0.000848714	1.48868
PI(40:0)	C49H95O13P	940.7	[M + NH4]+	0.000146983	0.000232643	6.809e-05	0.000103462	0.319632	2.15865
PI(40:1)	C49H93O13P	938.6	[M + NH4]+	2.51472e-06	9.69716e-06	5.11646e-06	1.06618e-05	1	0.491497
PI(40:2)	C49H91O13P	936.6	[M + NH4]+	7.79005e-06	1.62624e-05	2.27424e-05	5.79456e-05	1	0.342535
PI(40:3)	C49H89O13P	934.6	[M + NH4]+	1.50191e-05	3.43959e-05	1.2675e-05	3.06496e-05	1	1.18494
PI(40:4)	C49H87O13P	932.6	[M + NH4]+	0.000595044	0.000390874	0.000300523	0.000261766	0.00664901	1.98003
PI(40:5)	C49H85O13P	930.6	[M + NH4]+	0.00174031	0.00104897	0.00157128	0.00164594	0.0342009	1.10758
PI(40:6)	C49H83O13P	928.6	[M + NH4]+	0.00210198	0.00116157	0.00173988	0.00147884	0.00598661	1.20812
PI(40:7)	C49H81O13P	926.5	[M + NH4]+	9.43302e-05	0.000112428	9.09535e-05	0.000145682	1	1.03713
PI(40:8)	C49H79O13P	924.5	[M + NH4]+	1.6987e-05	3.39435e-05	2.85169e-05	5.24529e-05	1	0.595682
PI(42:10)	C51H79O13P	948.5	[M + NH4]+	1.56713e-05	2.72154e-05	1.31902e-05	2.51593e-05	1	1.1881
PI(42:2)	C51H95O13P	964.7	[M + NH4]+	6.29238e-06	1.65821e-05	2.27588e-06	6.35519e-06	1	2.76481
PI(42:3)	C51H93O13P	962.6	[M + NH4]+	6.91523e-07	3.80956e-06	1.68455e-07	8.58957e-07	1	4.10509
PI(42:4)	C51H91O13P	960.6	[M + NH4]+	2.12949e-07	1.22678e-06	2.6902e-07	1.37174e-06	1	0.791575
PI(42:5)	C51H89O13P	958.6	[M + NH4]+	7.31788e-07	3.79566e-06	1.2591e-06	4.58903e-06	1	0.581198
PI(42:6)	C51H87O13P	956.6	[M + NH4]+	2.14949e-06	6.97524e-06	4.8829e-07	1.9281e-06	1	4.40209
PI(42:7)	C51H85O13P	954.6	[M + NH4]+	6.86916e-06	2.40409e-05	2.75062e-06	6.98087e-06	1	2.49731
PI(42:8)	C51H83O13P	952.6	[M + NH4]+	1.0557e-05	2.31034e-05	7.4767e-08	3.81239e-07	1	141.199
PI(42:9)	C51H81O13P	950.5	[M + NH4]+	9.79129e-06	2.09793e-05	1.75119e-05	3.99884e-05	1	0.559121
PI(44:10)	C53H83O13P	976.6	[M + NH4]+	6.44902e-07	4.09317e-06	3.4395e-07	1.75381e-06	1	1.87499
PI(44:11)	C53H81O13P	974.5	[M + NH4]+	1.7301e-06	6.39325e-06	1.35132e-06	3.65659e-06	1	1.2803
PI(44:12)	C53H79O13P	972.5	[M + NH4]+	4.63027e-07	3.02064e-06	4.07341e-07	2.07704e-06	1	1.13671
PI(44:2)	C53H99O13P	992.7	[M + NH4]+	5.95126e-08	6.09823e-07	3.08435e-07	1.57272e-06	1	0.19295
PI(44:3)	C53H97O13P	990.7	[M + NH4]+	0	0	0	0	1	-
PI(44:4)	C53H95O13P	988.7	[M + NH4]+	7.04491e-07	3.22421e-06	7.97327e-07	2.98933e-06	1	0.883565
PI(44:5)	C53H93O13P	986.6	[M + NH4]+	1.75914e-06	1.3477e-05	0	0	1	-
PI(44:6)	C53H91O13P	984.6	[M + NH4]+	1.17874e-07	8.52417e-07	0	0	1	-
PI(44:7)	C53H89O13P	982.6	[M + NH4]+	7.21467e-07	3.6862e-06	5.69321e-07	2.08782e-06	1	1.26724
PI(44:8)	C53H87O13P	980.6	[M + NH4]+	2.31993e-06	7.1437e-06	2.3559e-07	8.6864e-07	1	9.8473
PI(44:9)	C53H85O13P	978.6	[M + NH4]+	1.68217e-06	1.03974e-05	1.82409e-06	6.41198e-06	1	0.922198
PS 42:2	C48H91O10PN	872.636	[M + H]+	6.39115e-05	5.28132e-05	1.38065e-05	3.52057e-05	1	4.6291
PS 42:3	C48H89O10PN	870.62	[M + H]+	2.01117e-05	1.54743e-05	5.41462e-06	1.33937e-05	1	3.71434
PS 42:4	C48H87O10PN	868.604	[M + H]+	3.56616e-06	6.35569e-06	2.82213e-06	7.62335e-06	1	1.26364
PS(32:0)	C38H74O10PN	736.5	[M + H]+	2.48676e-05	0.000114552	1.34385e-06	2.67095e-06	1	18.5047
PS(32:1)	C38H72O10PN	734.5	[M + H]+	9.87789e-06	3.56514e-05	2.65002e-06	6.67929e-06	1	3.72747
PS(34:0)	C40H78O10PN	764.5	[M + H]+	1.02482e-05	2.81368e-05	8.28302e-06	1.86676e-05	1	1.23725
PS(34:1)	C40H76O10PN	762.5	[M + H]+	4.68561e-05	8.88389e-05	1.24195e-05	2.30415e-05	1	3.7728
PS(34:2)	C40H74O10PN	760.5	[M + H]+	3.1878e-05	4.40168e-05	1.21897e-05	2.07775e-05	1	2.61517
PS(34:3)	C40H72O10PN	758.5	[M + H]+	1.96863e-05	6.65729e-05	3.71774e-07	1.29693e-06	1	52.9523
PS(34:4)	C40H70O10PN	756.5	[M + H]+	1.07318e-05	2.65374e-05	3.80373e-06	6.26629e-06	1	2.82138
PS(36:0)	C42H82O10PN	792.6	[M + H]+	8.53629e-06	3.1649e-05	6.23756e-07	3.18055e-06	1	13.6853
PS(36:1)	C42H80O10PN	790.6	[M + H]+	0.000466569	0.00192572	0.000336703	0.000652236	0.473397	1.3857
PS(36:2)	C42H78O10PN	788.5	[M + H]+	0.000112813	0.000355614	7.96599e-05	0.000184674	0.319632	1.41619
PS(36:3)	C42H76O10PN	786.5	[M + H]+	1.72522e-05	3.43339e-05	4.71511e-06	2.07831e-05	1	3.65892
PS(36:4)	C42H74O10PN	784.5	[M + H]+	4.68077e-05	7.06758e-05	6.01153e-05	9.36964e-05	1	0.778633
PS(36:5)	C42H72O10PN	782.5	[M + H]+	0.000124926	0.000176957	0.000155388	0.000144238	1	0.80396
PS(36:6)	C42H70O10PN	780.5	[M + H]+	6.05056e-06	1.85281e-05	1.17395e-05	3.34233e-05	1	0.515403
PS(38:0)	C44H86O10PN	820.6	[M + H]+	5.90297e-06	1.14094e-05	4.65301e-06	8.16158e-06	1	1.26864
PS(38:1)	C44H84O10PN	818.6	[M + H]+	2.50947e-05	0.000149693	1.56749e-05	3.44702e-05	0.319632	1.60094
PS(38:2)	C44H82O10PN	816.6	[M + H]+	2.8927e-05	0.00011445	8.65672e-06	2.58973e-05	0.319632	3.34156
PS(38:3)	C44H80O10PN	814.6	[M + H]+	3.48858e-05	0.000151038	9.11157e-06	3.20417e-05	0.319632	3.82874
PS(38:4)	C44H78O10PN	812.5	[M + H]+	0.000914967	0.00295358	0.00145984	0.00240682	0.0234485	0.62676
PS(38:5)	C44H76O10PN	810.5	[M + H]+	0.000177498	0.000315401	0.000250608	0.00025081	0.656774	0.70827
PS(38:6)	C44H74O10PN	808.5	[M + H]+	8.14497e-05	0.000136156	5.59162e-05	8.57725e-05	1	1.45664
PS(38:7)	C44H72O10PN	806.5	[M + H]+	0.000125218	0.000168363	0.000106361	0.000122132	1	1.17729
PS(40:1)	C46H88O10PN	846.6	[M + H]+	3.41279e-05	9.05624e-05	1.06033e-05	2.37776e-05	1	3.21862
PS(40:2)	C46H86O10PN	844.6	[M + H]+	2.05684e-05	5.70473e-05	8.36945e-06	2.06589e-05	1	2.45755
PS(40:3)	C46H84O10PN	842.6	[M + H]+	9.17735e-06	3.05915e-05	2.30726e-06	7.16928e-06	1	3.97759
PS(40:4)	C46H82O10PN	840.6	[M + H]+	6.72796e-05	0.000320995	3.92004e-05	8.32602e-05	0.319632	1.7163
PS(40:5)	C46H80O10PN	838.6	[M + H]+	8.96415e-05	0.000221739	4.44794e-05	0.000115998	0.319632	2.01535
PS(40:6)	C46H78O10PN	836.5	[M + H]+	7.69461e-05	0.000192053	6.06572e-06	1.62361e-05	0.319632	12.6854
PS(40:7)	C46H76O10PN	834.5	[M + H]+	0.000259484	0.000262973	0.000158818	0.000181917	0.911443	1.63384
PS(40:8)	C46H74O10PN	832.5	[M + H]+	5.07462e-05	8.34615e-05	1.16831e-05	1.96953e-05	1	4.34355
PS(42:10)	C48H74O10PN	856.5	[M + H]+	4.85019e-05	0.000100128	6.29323e-06	9.06984e-06	1	7.70699
PS(42:11)	C48H72O10PN	854.5	[M + H]+	4.65895e-06	1.63042e-05	3.46142e-06	1.56812e-05	1	1.34596
PS(42:5)	C48H84O10PN	866.6	[M + H]+	8.02953e-06	2.49509e-05	2.0936e-06	6.67266e-06	1	3.83528
PS(42:6)	C48H82O10PN	864.6	[M + H]+	8.78829e-06	2.78479e-05	1.20958e-06	6.16768e-06	1	7.26555
PS(42:7)	C48H80O10PN	862.6	[M + H]+	1.49409e-05	3.40255e-05	2.33315e-06	6.6653e-06	1	6.40373
PS(42:8)	C48H78O10PN	860.5	[M + H]+	1.23584e-05	2.66541e-05	5.09696e-06	1.02265e-05	1	2.42466
PS(42:9)	C48H76O10PN	858.5	[M + H]+	3.44275e-05	7.22406e-05	7.93829e-06	1.26777e-05	1	4.33689
PS(44:10)	C50H78O10PN	884.5	[M + H]+	7.39087e-06	2.90952e-05	1.86355e-06	5.0554e-06	1	3.96601
PS(44:11)	C50H76O10PN	882.5	[M + H]+	1.02339e-05	2.83724e-05	1.91009e-06	4.60008e-06	1	5.35781
PS(44:12)	C50H74O10PN	880.5	[M + H]+	1.41564e-05	2.98839e-05	2.4247e-06	4.02188e-06	1	5.83841
PS(44:2)	C50H94O10PN	900.7	[M + H]+	0.000123346	0.000282226	9.96124e-06	1.62339e-05	0.111172	12.3826
PS(44:3)	C50H92O10PN	898.6	[M + H]+	4.86495e-05	9.82738e-05	6.9596e-06	1.28769e-05	1	6.99028
PS(44:4)	C50H90O10PN	896.6	[M + H]+	5.30029e-05	0.00012923	4.15503e-06	7.73941e-06	1	12.7563
PS(44:5)	C50H88O10PN	894.6	[M + H]+	1.60711e-05	5.53079e-05	1.23335e-06	3.69224e-06	1	13.0304
PS(44:6)	C50H86O10PN	892.6	[M + H]+	8.65993e-06	3.3217e-05	1.03597e-06	5.28245e-06	1	8.35922
PS(44:7)	C50H84O10PN	890.6	[M + H]+	1.02604e-05	3.95212e-05	1.71627e-06	6.21912e-06	1	5.97832
PS(44:8)	C50H82O10PN	888.6	[M + H]+	1.3066e-05	5.15069e-05	1.59819e-06	4.9294e-06	1	8.17549
PS(44:9)	C50H80O10PN	886.6	[M + H]+	8.14385e-06	3.90693e-05	1.60059e-06	3.225e-06	1	5.08803
SM(16:0)	C39H79N2O6P	703.6	[M + H]+	0.494859	0.27615	0.200939	0.0972661	1.20089e-06	2.46274
SM(16:1)	C39H77N2O6P	701.5	[M + H]+	0.0766031	0.0450302	0.0302876	0.0167771	6.70771e-09	2.52919
SM(18:0)	C41H83N2O6P	731.6	[M + H]+	0.102624	0.0620758	0.036848	0.0260969	1.72416e-06	2.78508
SM(18:1)	C41H81N2O6P	729.6	[M + H]+	0.0678658	0.0452073	0.0227753	0.0145053	1.04545e-09	2.97981
SM(22:0)	C45H91N2O6P	787.7	[M + H]+	0.0169449	0.0440455	0.0629776	0.0786107	0.000551185	0.269062
SM(22:1)	C45H89N2O6P	785.6	[M + H]+	0.0893011	0.0972581	0.0391446	0.0412218	0.088876	2.28131
SM(24:0)	C47H95N2O6P	815.7	[M + H]+	0.0893258	0.053822	0.0317695	0.025063	3.78261e-06	2.81168
SM(24:1)	C47H93N2O6P	813.7	[M + H]+	0.266469	0.139932	0.133775	0.0503537	2.75305e-06	1.99192
